# Supplementary material
Source: PubMed Central journal article supplement (PMC7481673)
Supplement: rsta20190357supp1.pdf [file rsta20190357supp1.pdf]

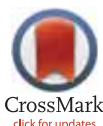

Article submitted to journal

**Subject Areas:**

Biological Oceanography, Remote sensing, Climate change

**Keywords:**

Phaeocystis, Arctic, Phytoplankton, Climate, Ocean-colour, Remote-sensing

**Author for correspondence:**

Andrew Orkney

e-mail:

[andrew.orkney@earth.ox.ac.uk](mailto:andrew.orkney@earth.ox.ac.uk)

Bio-Optical evidence for increasing *Phaeocystis* dominance in the Barents Sea (Supplementary information)  
<http://dx.doi.org/10.1098/rsta.2019.0357>

A. Orkney<sup>1</sup>, T. Platt<sup>2</sup>,

B.E. Narayanaswamy<sup>3</sup>, I. Kostakis<sup>4,5</sup>

H.A. Bouman<sup>1</sup>

<sup>1</sup>Department of Earth Sciences, University of Oxford, 3 South Parks Road, Oxford OX1 3AN

<sup>2</sup>Plymouth Marine Laboratory, Prospect Place, Plymouth, PL1 3DH

<sup>3</sup>Scottish Association for Marine Science, Scottish Marine Institute, Oban, PA37 1QA

<sup>4</sup>School of Computing, University of Portsmouth, Portsmouth PO1 3HE, UK

<sup>5</sup>Physics Department, University of Strathclyde, Glasgow, G4 ONG, UK

We provide a detailed description of the structure and performance of the bio-optical algorithm we used to detect dominant phytoplankton groups in remotely sensed ocean-colour of the Barents Sea. The bio-optical algorithm can itself be de-constructed into 3 modules, which mask coccolithophore blooms, sediment and river plumes; recognise blooms of highly-packaged phytoplankton and finally distinguish between chlorophyll-c3-rich *Phaeocystis* blooms and chlorophyll-c3-poor diatom blooms. We then consider drift in the retrieval of the derived proxy of chlorophyll-c3 absorption signal and present time series of blooms identified in the Labrador and Barents Seas to supplement our submission.

## 2 1. Supplementary information

3 A modular flow chart of the structure of our Barents Sea Bio-Optical algorithm is presented in Figure 1.

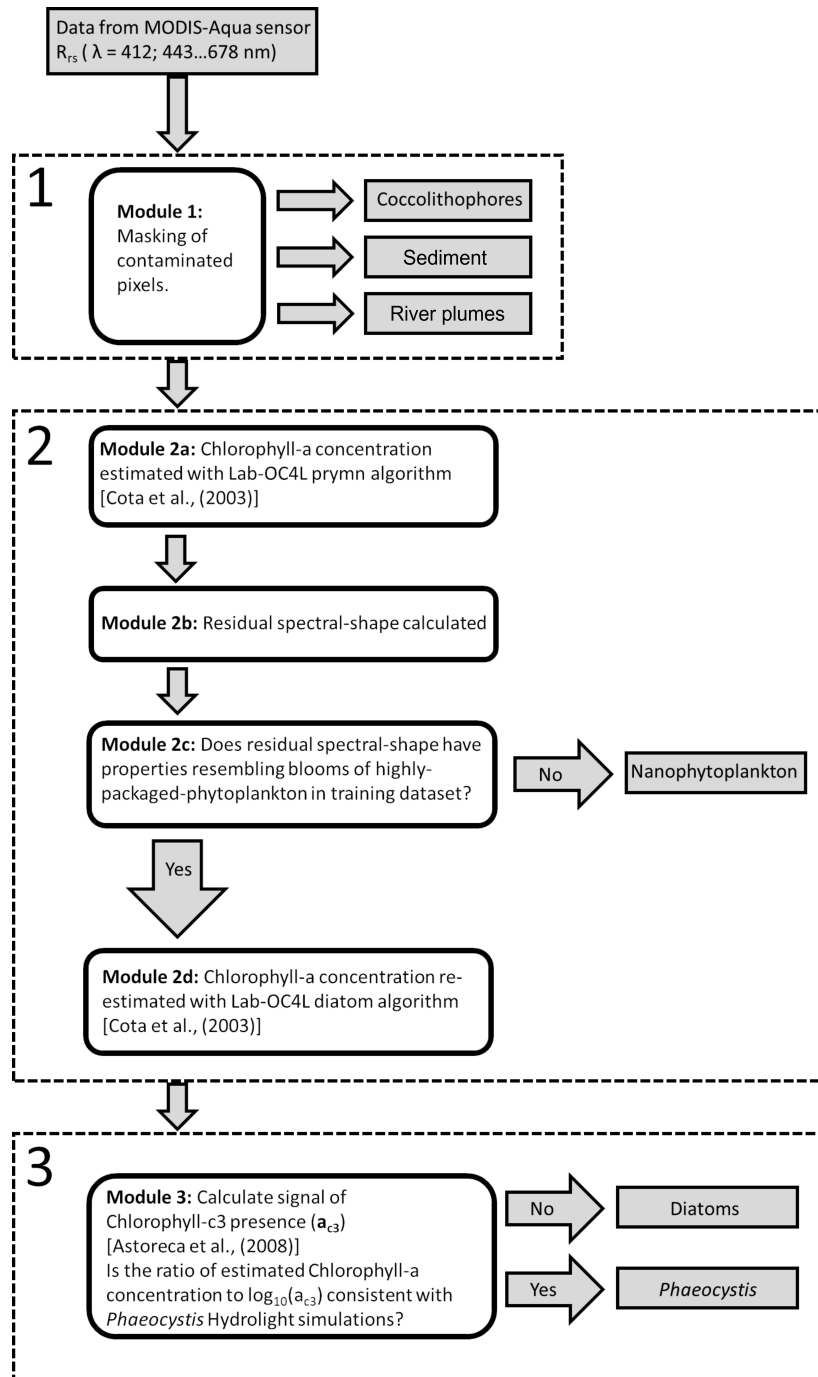

Figure 1. Modular flow chart of the structure of the Barents Sea bio-optical algorithm.

## 5 (a) Module 1: Masking contaminated pixels

6 We developed our bio-optical algorithm to discern different phytoplankton groups under the  
7 working assumption that the ratio of water-leaving radiance to down-welling irradiance ( $R_{rs}$ ),  
8 is determined principally by elastic scattering ( $R^E$ ). Elastic scattering is itself a wavelength-  
9 dependent ( $\lambda$ ) function of absorption ( $a$ ) and backscattering ( $b_b$ ):

$$R^E(\lambda, 0) = r \frac{b_b(\lambda)}{a(\lambda) + b_b(\lambda)}, \quad (1.1)$$

10 where  $r$  is a coefficient of proportionality that varies with factors like the angle of incident light  
11 and the viewing angle.

12 The overall contribution of absorption by pure water, phytoplankton and CDOM to total  
13 absorption is additive;

$$a(\lambda) = a_w(\lambda) + a_{ph}(\lambda) + a_{cdom}(\lambda). \quad (1.2)$$

14 By assessing spectral shape- the wavelength dependent variation in  $R_{rs}$ , we avoid the  
15 requirement to consider variation in  $r$  (assuming it does not vary with wavelength), and we make  
16 the assumption that variation in  $a$  and  $b_b$  are driven principally by variation in phytoplankton  
17 taxonomic composition and pigment biomass. We take  $a_w(\lambda)$  to be unchanging and previous  
18 research has shown that, in the open waters of the Barents Sea,  $a_{cdom}(\lambda)$  (absorption due to  
19 Coloured Dissolved Organic Matter (CDOM)) is invariant across seasons and major hydrographic  
20 features and can therefore be treated as constant [1], with an absorption coefficient of  $0.04 \text{ m}^{-1}$  at  
21 400 nm, decaying according to the relationship found in *Bricaud et al., (1981)* [2];

$$a_{cdom}(\lambda) = 0.04e^{(-0.0014(\lambda-440))} \quad (1.3)$$

22 Hence, as the spectrum of  $a_{cdom}(\lambda)$  is constant, we assume that change in  $a(\lambda)$  is driven by  
23 change in  $a_{ph}(\lambda)$  (phytoplankton absorption).

24 These assumptions are, however, violated when non-algal particles, which have their own strong  
25 absorption [3] and backscattering properties [4], are present in substantial concentrations. River  
26 plumes can also carry terrigenous organic matter, increasing  $a_{cdom}(\lambda)$ , and therefore violating  
27 our assumptions [5].

28 We therefore needed a means by which to identify ocean-colour observations in which our  
29 assumption that variation in spectral shape is driven by phytoplankton absorption is violated,  
30 so that we could mask them from consideration, which includes masking observations where  
31 coccolithophore blooms control spectral shape, because the heightened backscattering of light off  
32 of their biomineral liths greatly changes ocean-colour [6].

33 Module 1 (Figure 1) is the first of the stack of three stages that together constitute our bio-optical  
34 algorithm. We performed a Principal Component Analysis (PCA) to explore variation in ocean-  
35 colour  $R_{rs}$  measurements taken from the Barents Sea between 0 and 80 degrees East and 0 and  
36 85 degrees North, in July 2014. We selected this region and time because coccolithophore blooms  
37 have been reported [7]. The geographic range of our sample also included the Ob River plume [5]  
38 and sediment-dominated fjords of the Svalbard archipelago [4]. We identified the geographic  
39 regions corresponding to these groups and created linear discriminants that distinguish these  
40 spectra from those of the open-ocean, where our assumptions can reasonably be expected to hold  
41 true. PC1-2 space spreads the dataset out into a central Gaussian distribution with 3 aberrant tails,  
42 corresponding to coccolithophores, river plumes and waters rich in fjordic sediments (Figure 2).

43



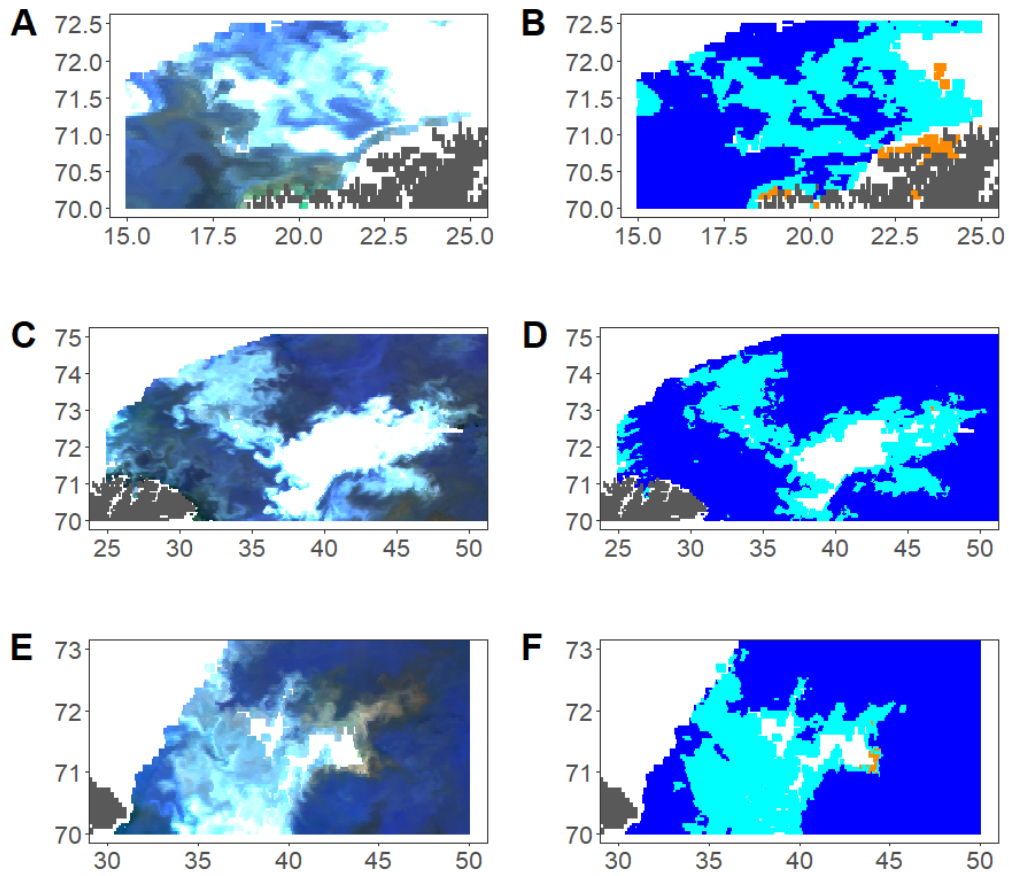

**Figure 3.** Examples of true colour images of coccolithophore blooms on the 24<sup>th</sup> of July 2003, 6<sup>th</sup> of July 2016 and 18<sup>th</sup> of July 2018 (A,C,E) and corresponding coccolithophore masks (B,D,F). Normal ocean is masked blue, coccolithophores are masked cyan and sediment is masked orange.

50 (b) Module 2: Discrimination of diatoms and *Phaeocystis* from  
51 nanophytoplankton

52 Module 2 (Figure 1) distinguishes blooms of highly-packaged phytoplankton (diatoms and the  
53 colonial prymnesiophyte *Phaeocystis*), from populations of unicellular nanophytoplankton. We  
54 adopt the term ‘nanophytoplankton’ here to describe a subset of those populations referred to  
55 as ‘prymnesiophyte’ in *Stuart et al., (2000)* and *Cota et al., (2003)* [11,12]. Nanophytoplankton  
56 identified in the Labrador Sea by *Stuart et al., (2000)* and *Cota et al., (2003)* are optically distinct  
57 from *Phaeocystis*, with a much lower degree of pigment-packaging. Given that *Phaeocystis* is  
58 a type of prymnesiophyte, we believe the term ‘nanophytoplankton’, is more useful for our  
59 purposes. We present the relationship between the system of terms we use here in Figure 5.  
60 Module 2 was constructed empirically; a training dataset of diatom, dinoflagellate, *Phaeocystis*  
61 and nanophytoplankton ocean-colour observations was constructed with reference to samples of  
62 phytoplankton collected in the Barents Sea between June 2017 and July 2018 (Sampling locations  
63 displayed in Figure 4).

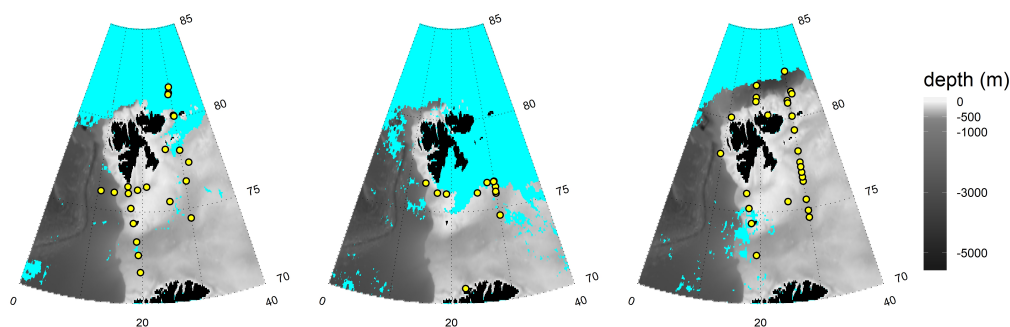

**Figure 4.** Left: Map of phytoplankton sampling sites on cruise JR16006 (Julian days 189-217), Centre: Map of phytoplankton sampling sites on cruise HH23042018 (Julian days 114-122), Right: Map of phytoplankton sampling sites on cruise JR17006 (Julian days 163-185). Regions with no concomitant MODIS-Aqua ocean-colour observations during the cruise window are masked in cyan, providing a general indication of the sea ice edge.

64  
65 Distinct phytoplankton assemblages dominating in-situ samples were recognised by their  
66 absorptive properties. We followed the protocol of *Stuart et al., (2000)* [11] to record phytoplankton  
67 absorption spectra, including their pigment extraction methods and choice of path-length  
68 correction. In total, 191 Barents absorption spectra are presented in this study.  
69 We chose to match our method to *Stuart et al., (2000)* so that we could pool our Barents dataset  
70 with a similar dataset of  $a_{ph}(\lambda)$  collected in the Labrador Sea [11–13], in which diatom and  
71 *Phaeocystis*-dominated blooms had also been sampled. The Labrador Sea dataset was collected  
72 between 1996 and 2001 in multiple seasons. Comparing  $a_{ph}(\lambda)$  in the Barents and Labrador  
73 Seas therefore allowed us to gain greater confidence that any recognition of distinct bio-  
74 optical assemblages common to both Seas is robust to seasonal and inter-annual variation. We  
75 then decomposed the  $a_{ph}(\lambda)$  associated with our phytoplankton samples, and those of *Stuart*  
76 *et al., (2000)* into Gaussian functions that represent the contribution from different suites of  
77 phytoplankton pigments to absorption, following the method of *Chase et al., (2013)* (itself a

78 formalisation of earlier schemes employed by *Hoepffner and Sathyendranath, (1993)* and *Lohrenz*  
 79 *et al., (2003)* [14–16]). This approach reduced the number of variables and made the dataset  
 80 more tractable. *Liu et al., (2019)* have previously demonstrated the efficacy of this method  
 81 in summarising variability in  $a_{ph}(\lambda)$ , by relating decomposed  $a_{ph}(\lambda)$  to concentrations of  
 82 taxonomically-indicative pigments measured with High Performance Liquid Chromatography  
 83 (HPLC) in the western Barents Sea [17]. The Labrador Sea phytoplankton samples had  
 84 already been prescribed likely identities as diatom or nanophytoplankton dominated, based  
 85 on HPLC [11], but we added a third category, classifying those blooms rich in chlorophyll-c3  
 86 as *Phaeocystis*, which commonly occur off the Greenland Shelf [12,18]. Using a combination of  
 87 optical microscopy, HPLC and PCA performed on the decomposed  $a_{ph}(\lambda)$ , we recognised that  
 88 the Barents phytoplankton samples we collected could be divided into 4 distinct bio-optical  
 89 communities dominated by nanophytoplankton, colonial *Phaeocystis*, diatoms and dinoflagellates  
 90 (Figure 5). It can be seen in Figure 5 that *Phaeocystis* is optically distinct from nanophytoplankton–  
 91 exhibiting a much greater degree of pigment-packaging and having a greater resemblance to the  
 92 diatoms; a shoulder in  $a_{ph}(\lambda)$  around 469 nm distinguishes *Phaeocystis* from diatoms. This feature  
 93 probably results from absorption due to chlorophyll-c3.

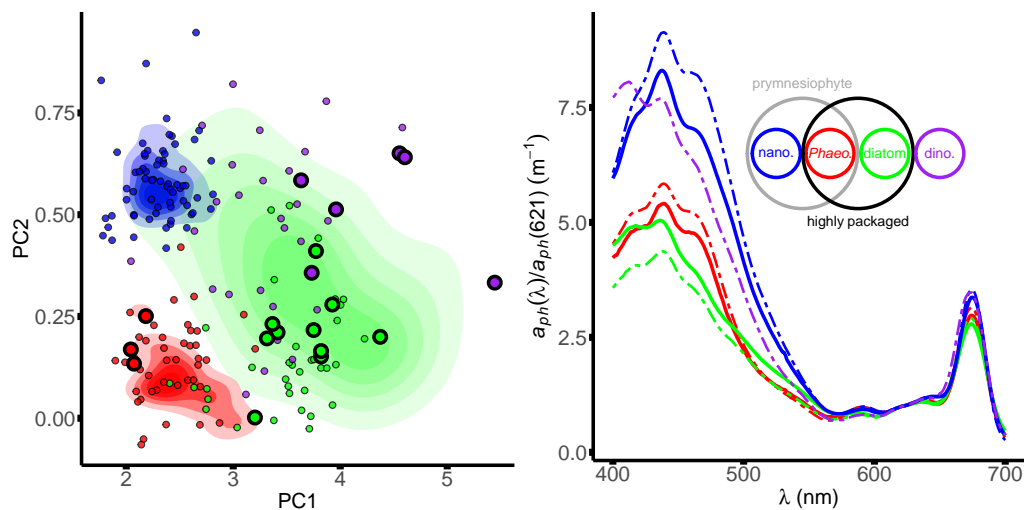

**Figure 5.** Left: A PCA space representing variation in the optical properties of the Barents phytoplankton samples. The density gradients represent the regions of this space occupied by nanophytoplankton, diatom and *Phaeocystis* samples identified in the Labrador Sea (blue, green, red). The bold points represent a sub-set of Barents Sea phytoplankton which optical microscopy showed to be dominated exclusively by *Phaeocystis*, diatoms or dinoflagellates (red, green, purple), while the smaller points represent the rest of the Barents phytoplankton samples after a fuzzy clustering algorithm was instructed to divide them into four groups. Right: Representative average absorption spectra for nanophytoplankton, dinoflagellates, *Phaeocystis* and diatoms (blue, purple, green, red) for the Labrador (bold) and Barents (dashed) Sea datasets, showing high similarity.

94 We then took the date of sampling and geographic locations of our in-situ Barents samples  
 95 and collected all available daily MODIA-Aqua ocean-colour observations [19] within 1 degree  
 96 latitude or longitude; 18,000 observations in total. Module 1 was used to exclude observations  
 97 contaminated by coccolithophores, sediments or river plumes. The remaining observations were  
 98 then deposited into a training dataset of  $\approx 16,000$  ocean-colour observations. We labelled the  
 99 observations in the training dataset, according to the inferred phytoplankton group (Figure 5)  
 100 of the in-situ sample they were associated with.

101 Variation in the ocean-colour spectral shape is primarily driven by variations *chl-a* rather than

102 variation between different phytoplankton assemblages, potentially obscuring patterns of ocean-  
103 colour that might distinguish different bio-optical assemblages of phytoplankton. We followed  
104 a similar method to *Alvain et al., (2008) [20]* in order to remove the confounding effects of *chl-*  
105 *a* on ocean-colour. We constructed a regression of ocean-colour in all diatom-labelled entries in  
106 our database against the *chl-a* concentration inferred from them with the **Lab-OC4L diatom *chl-a***  
107 algorithm of *Cota et al., (2003)*. We then subtracted the predicted spectra from the MODIS-Aqua  
108 ocean-colour observations in our training database, to arrive at ‘residual’ ocean-colour, in which  
109 the remaining variance should correspond to variation in phytoplankton assemblage and not  
110 simply *chl-a* concentration. In order to be especially conservative, we decided to estimate the *chl-*  
111 *a* concentration of all ocean-colour observations that we hope to classify in accordance with the  
112 **Lab-OC4L prymn *chl-a*** algorithm published by *Cota et al., 2003 [12]*, which generally predicts  
113 higher values than **Lab-OC4L diatom**. This has the effect of decreasing bias to conflate change in  
114 *chl-a* with change in phytoplankton groups.

115 We then used 1000 permutations of hold-p-out cross validation, with p set to 500, to build  
116 linear discriminant analyses and test whether we could consistently use the held-in ocean-colour  
117 observations to classify the held-out ocean-colour observations in our training dataset. We found  
118 that diatoms and *Phaeocystis* could reliably be distinguished from nanophytoplankton (3% and  
119 20% of diatom and *Phaeocystis*-labelled entries are classified as nanophytoplankton, respectively),  
120 but that diatoms and *Phaeocystis* were often misclassified (53% of *Phaeocystis*-labelled entries were  
121 classified as diatoms). We found it difficult to consistently recognise dinoflagellates. While 57%  
122 of dinoflagellate-labelled entries were correctly identified, we suspected this was because they  
123 tended to occur in oligotrophic waters– and that their identification was more a function of a  
124 residual signal of *chl-a* content and not of assemblage-specific phytoplankton optical properties.  
125 Some 68% of nanophytoplankton-labelled entries were correctly recognised.

126 This capacity for consistent classification of our training dataset compared favourably with  
127 existing algorithms that discern diatoms from nanophytoplankton, developed by *Sathyendranath*  
128 *et al., 2004 [13]* and *Jackson et al., 2010 [21]*. We tested these two algorithms by adapting them  
129 to use the nearest available MODIS-Aqua wavebands. When we used the two diatom-detection  
130 algorithms to classify spectra in our training dataset they tended to have a bias in favour of  
131 diatoms (only 40 and 42% of nanophytoplankton-labelled entries in our dataset were correctly  
132 classified, respectively).

133

### 134 (c) Module 3: Discrimination of diatom and *Phaeocystis* blooms

135 Given our weaker confidence in the detection of dinoflagellate blooms, we made the decision  
136 to exclude dinoflagellate-labelled entries from our training dataset and to concentrate on the  
137 utility of the linear discriminant we had found for distinguishing blooms of highly-packaged  
138 phytoplankton (diatoms and *Phaeocystis*) from ocean waters dominated by nanophytoplankton.  
139 Owing to the optical similarity of diatom and *Phaeocystis*-labelled ocean-colour residual spectral  
140 shape, we considered the possibility that the differences between diatom and *Phaeocystis* ocean-  
141 colour observations are subtle and that our linear discriminant analysis had not found them. We  
142 therefore opted to develop a third algorithm module, with the intent to take ocean-colour residual  
143 spectra labelled as highly-packaged phytoplankton and divide them into diatom and *Phaeocystis*  
144 dominated measurements.

145

146 Module 3 (Figure 1) is a semi-empirical algorithm. We made use of Hydrolight-Ecolight software  
147 [22] to simulate the expected ocean-colour under conditions of diatom and *Phaeocystis* dominance,  
148 for *chl-a* concentrations ranging between 0.1 and 25 mg m<sup>-3</sup> (measured values of in-situ samples  
149 varied between 0.11 and 24.23 mg m<sup>-3</sup>). We implemented these simulations with phytoplankton  
150 absorption spectra for our diatom and *Phaeocystis* groups (as in Figure 5), a chlorophyll-  
151 specific scattering model based on a combination of Barents and Liqueurian Sea measurements  
152 and a chlorophyll-specific back-scattering model based on a combination of Barents Sea and



153 NOMAD measurements [23]. The spectral absorption of phytoplankton was constrained to  
 154 evolve according to the relationship identified in *Bricaud et al., (1995)* [24] and absorption due  
 155 to CDOM was treated as constant, with a value of  $0.04 \text{ m}^{-1}$  at 440 nm [1], decaying with  
 156 wavelength according to the function identified by *Bricaud et al., (1981)* [2]. Scattering and back-  
 157 scattering model coefficients are presented in Table 1, wherein scattering and back-scattering  
 158 evolve according to equation 1.4:

$$b_i(\lambda) = A_i(\lambda)(chl-a)^{B_i(\lambda)}, \quad (1.4)$$

159 where  $b_1$  represents total scattering of particles and seawater ( $\text{m}^{-1}$ ),  $b_2$  represents backscattering  
 160 ( $\text{m}^{-1}$ );  $chl-a$  is the chlorophyll-a concentration ( $\text{mg m}^{-3}$ ), and  $A_i$  and  $B_i$  represent fit parameters.

**Table 1.** Scattering and Backscattering model coefficients and goodness of fit.

| $\lambda$ (nm) | $A_1$  | $B_1$  | $R_1^2$ | $A_2$         | $B_2$  | $R_2^2$ |
|----------------|--------|--------|---------|---------------|--------|---------|
| 412            | 0.3893 | 0.0842 | 0.0177  | 0.0027        | 0.4116 | 0.5727  |
| 440            | 0.4235 | 0.4089 | 0.2606  | 0.0026        | 0.4967 | 0.7643  |
| 488            | 0.4271 | 0.4282 | 0.2814  | 0.0023        | 0.5017 | 0.7614  |
| 510            | 0.4324 | 0.4403 | 0.2961  | 0.0022        | 0.5038 | 0.7581  |
| 532            | 0.4418 | 0.4852 | 0.4803  | 0.0021        | 0.4898 | 0.7503  |
| 555            | 0.4459 | 0.5105 | 0.5071  | 0.0020        | 0.5033 | 0.7453  |
| 650            | 0.3972 | 0.4554 | 0.2833  | 0.0016        | 0.5169 | 0.7132  |
| 676            | 0.3777 | 0.5215 | 0.4662  | 0.0015        | 0.5048 | 0.7016  |
| 712            | 0.3595 | 0.1879 | 0.0884  | no NOMAD data |        |         |

161 We recognise that *Phaeocystis* is a chlorophyll-c3-rich plankton, compared with diatoms, and  
 162 therefore surmised that we might be able exploit this optical difference— evident in Figure  
 163 5— in order to distinguish between our simulated spectra, and then evaluate whether it is  
 164 possible to distinguish diatom and *Phaeocystis* blooms in our training dataset. We adopted the  
 165 chlorophyll-c3 absorption algorithm developed by *Astoreca et al., (2008)* [25] to determine whether  
 166 a signal attributable to chlorophyll-c3 could be detected in the diatom and *Phaeocystis* Hydrolight  
 167 simulations, and made use of the **Lab-OC4L diatom**  $chl-a$  algorithm published by *Cota et al., (2003)*  
 168 [12] to infer  $chl-a$  content, reasoning that *Phaeocystis* would be typified by a high chlorophyll-  
 169 c3 signal per unit biomass, compared to diatoms. The chlorophyll-c3 algorithm of *Astoreca et*  
 170 *a., (2008)* relies upon use of the MODIS land band centred at 469 nm to detect a shoulder in  
 171  $a_{ph}(\lambda)$  associated with chlorophyll-c3 (consult Figure 5 to observe this feature). The use of the  
 172 MODIS land bands, including 469 nm, has already been applied to the identification of bio-  
 173 optically distinct phytoplankton blooms by *Hu et al., (2010)* [26], who successfully identified  
 174 *Trichodesmium* blooms in optically complex coastal waters. We found  $chl-a$  estimates were broadly  
 175 lower than expected (Figure 6), however given that the magnitude of simulated absorption  
 176 spectra used as input to Hydrolight are computed as a function of  $chl-a$  we should still expect the  
 177 relationship between absorption signal attributable to chlorophyll-c3 and  $chl-a$  to be informative.  
 178 We found, upon performing a PCA on ocean-colour residual spectra in our training database  
 179 labelled as diatom or *Phaeocystis*, that there was a bimodal normal distribution of the data in  
 180 Principal Component 5-6 space (Figure 6 a,d). We suspected that this likely represented two  
 181 dominating phytoplankton assemblages, but we note that the entries labelled as diatom or  
 182 *Phaeocystis* are distributed across both of the Gaussian features, suggesting that the reason that  
 183 linear discriminant analysis could not retrieve an effective discriminant was due to labelling in the  
 184 training dataset confusing these groups— probably as a result of their close spatial co-occurrence  
 185 during cruises. It is clear that the relationship between  $chl-a$  and the common logarithm of  
 186 absorption signal attributable to chlorophyll-c3 ( $\log_{10}(a_{c3})$ ) separates diatom and *Phaeocystis* from  
 187 one another in Hydrolight simulations (Figure 6 c). We derived a linear discriminant relating



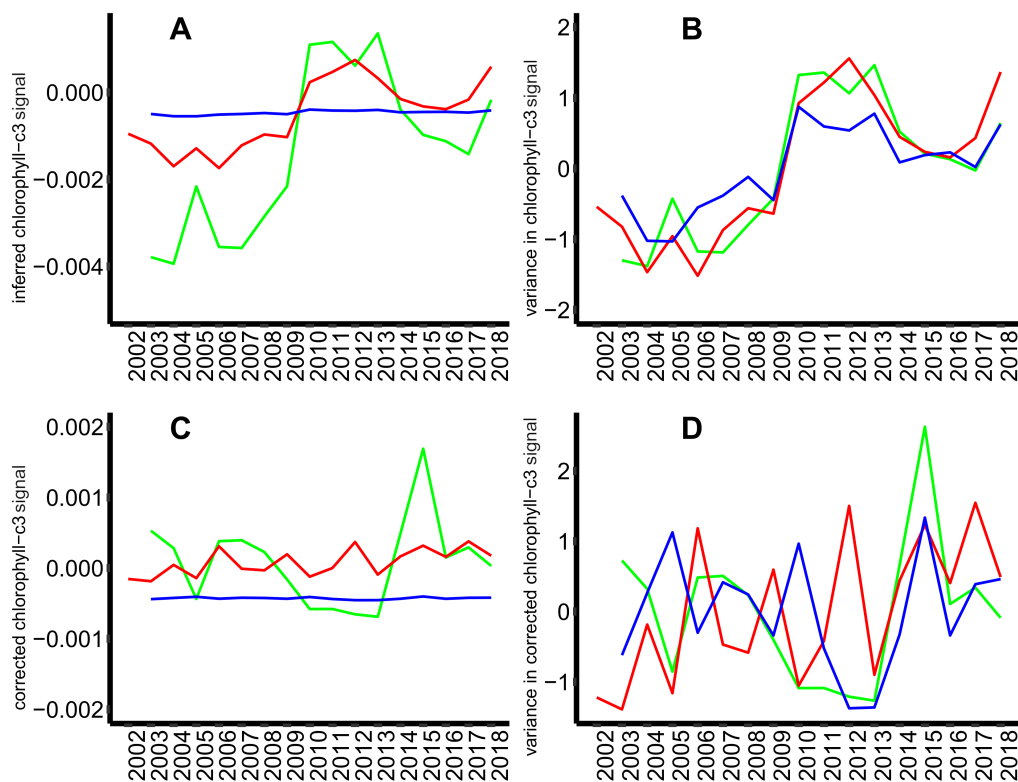

**Figure 7.** A) Annually-binned mean signal due to chlorophyll-c3 for the Labrador (green), Barents (red) and North-Atlantic Sub-Tropical Gyre (blue). B) Trends in inferred chlorophyll-c3 signal normalised to variance, with Sub-Tropical Gyre variance multiplied by 10 to make it visible. C) Annually-binned mean signal due to chlorophyll-c3 after a correction for drift is applied. D) Trends in corrected chlorophyll-c3 signal normalised to variance, with Sub-Tropical Gyre variance multiplied by 10 to make it perceptible.

192 We now move on to discuss the stability of the derived variable, chlorophyll-c3 absorption signal  
 193 ( $a_{c3}$ ), in time series of MODIS-Aqua ocean-colour. We assessed this by compiling time series of  
 194 mean  $a_{c3}$  estimated from ocean-colour across several years in different parts of the global ocean  
 195 that we would not expect to behave in unison. If these disparate regions show common changes it  
 196 may provide evidence of systematic bias in the inference of  $a_{c3}$ . We chose to investigate the North  
 197 Atlantic Sub-Tropical Gyre in particular because we should expect the ocean-colour in the region  
 198 to be relatively constant over time, as it is oligotrophic ( $chl-a < 0.1 \text{ mg m}^{-3}$ ), and to a first-order  
 199 may be presumed to represent clear ocean waters when contrasted with the eutrophic Barents or  
 200 Labrador Seas (which we define as the regions between 70-85 degrees North, 0-50 degrees East  
 201 and 50-65 degrees North, 40 to 60 degrees West).

202 In Figure 7 the North Atlantic Sub-Tropical Gyre region is assumed to occupy the region  
 203 between 30-50 degrees West and 25-35 degrees North. We downloaded MODIS-Aqua ocean-  
 204 colour observations in this region for Julian days 130-135 between 2003-2018. The fact that  $a_{c3}$   
 205 in this region is clearly related to that in the Barents and Labrador Seas (Figure 7 b) evidences  
 206 drift in the representation of ocean-colour from the MODIS-Aqua r2018.1 reprocessing; a clear  
 207 step-change is visible in all time series at 2010, for example. It is hence necessary to correct for this  
 208 systemic form of bias. Our correction scheme is based on that of Taylor *et al.*, [27], who observed

209 a shift in the spectral output of the IASI (Infrared Atmospheric Sounding Interferometer) remote-  
 210 sensing platform in 2010, which biased results in an algorithm they had developed to infer  
 211 sulphur dioxide. To correct for this drift *Taylor et al.*, took the lowest concentration of inferred  
 212 sulphur dioxide in any image, that was within 1 standard deviation of the mean, and added its  
 213 magnitude to all remaining pixels. In our approach we first constrained all  $a_{c3}$  signal values to  
 214 within -0.01 and 0.005 (see Figure 7 a), so that aberrant values would not significantly disturb  
 215 calculation of the standard deviation. The lower negative limit of -0.01 may be surprising, but  
 216 *Astoreca et al., (2008)* [25] themselves found that inferred  $a_{c3}$  signal became negative in diatom-  
 217 dominated conditions. We then divided the values into an annually-binned time series and  
 218 calculated the difference between the mean annual  $a_{c3}$  values and the lowest  $a_{c3}$  value in each  
 219 annual bin that fell within 1 standard deviation of the mean  $a_{c3}$  in each bin. We added the  
 220 magnitude of the lowest annually-binned  $a_{c3}$  values to the remaining  $a_{c3}$  values in each bin, and  
 221 then shifted the resulting absorption values so that the mean of all  $a_{c3}$  values between 2010-2018  
 222 matched the mean of the original  $a_{c3}$  values (since our bio-optical algorithm was constructed  
 223 around in-situ samples collected after the 2010 shift in inferred chlorophyll-c3 absorption). In  
 224 our efforts to illustrate drift in sensor output we computed pair-wise t-tests comparing mean  
 225  $R_{rs}$  values between 2003-2009 and 2010-2018 in the North Atlantic Sub-Tropical Gyre (Figure  
 226 8). We found that a significant shift has occurred among the most blue bands and that this  
 227 was associated with an decrease in the  $R_{rs}$  of bands with the shortest wavelengths. *Astoreca*  
 228 *et al., (2008)* had speculated on the question of whether minute differences in  $R_{rs}$  near 469 nm  
 229 would be perceptible by remote-sensing platforms. We believe we have found evidence that  
 230 these differences are detectable (Figure 6), but we caution that for the particular application of  
 231 distinguishing *Phaeocystis* from diatom blooms, it appears necessary to account for anomalies  
 232 resulting from temporal drift. We caution that different correction schemes may be necessary  
 233 for future ocean-colour reprocessings, because they may subtly alter the ratios between different  
 234 ocean-colour wavebands in a systematic fashion. After a correction scheme is applied, it can be  
 235 seen that temporal drift in mean annually-binned  $a_{c3}$  is largely removed and patterns of variance  
 in the different seas can be considered decoupled (Figure 7).

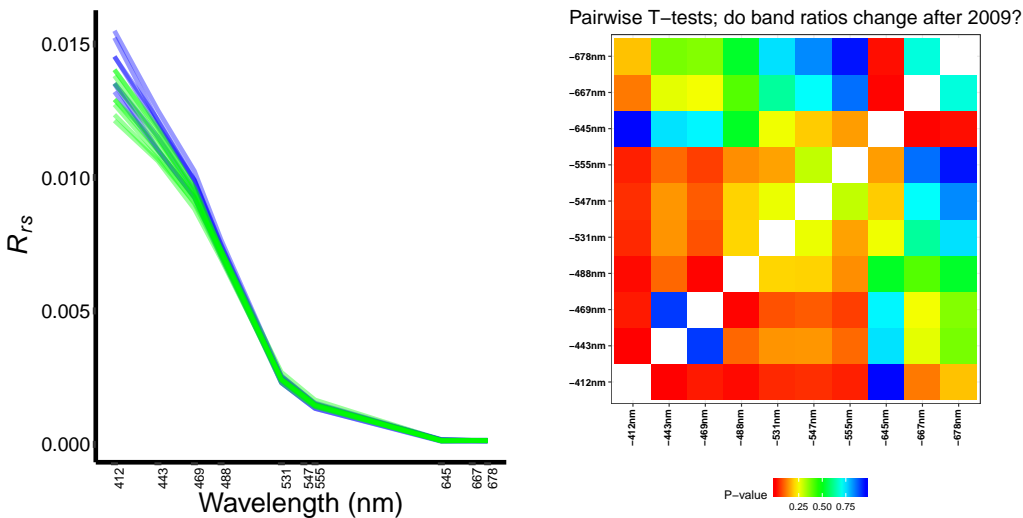

**Figure 8.** Left: Ocean-colour reflectance spectra for the North Atlantic Sub-Tropical Gyre before 2010 (blue) and after 2010 (green), a shift in spectral shape is evident. Right: Pair-wise tests for separation of means show that band ratios among the bands 443, 469 and 488nm have shifted significantly after 2010.

237 Figures 9 and 10 represent time series for the occurrence of different phytoplankton blooms,  
238 identified with our experimental bio-optical algorithm, in the Labrador and Barents Seas, once  
239 the correction for drift is applied. These figures are intended to be used as an adjunct to aid  
240 interpretation of the main text. Figure 9 is a validation exercise, comparing our experimental bio-  
241 optical algorithm classifications with an inter-annual time series of phytoplankton assemblages  
242 presented in [18].

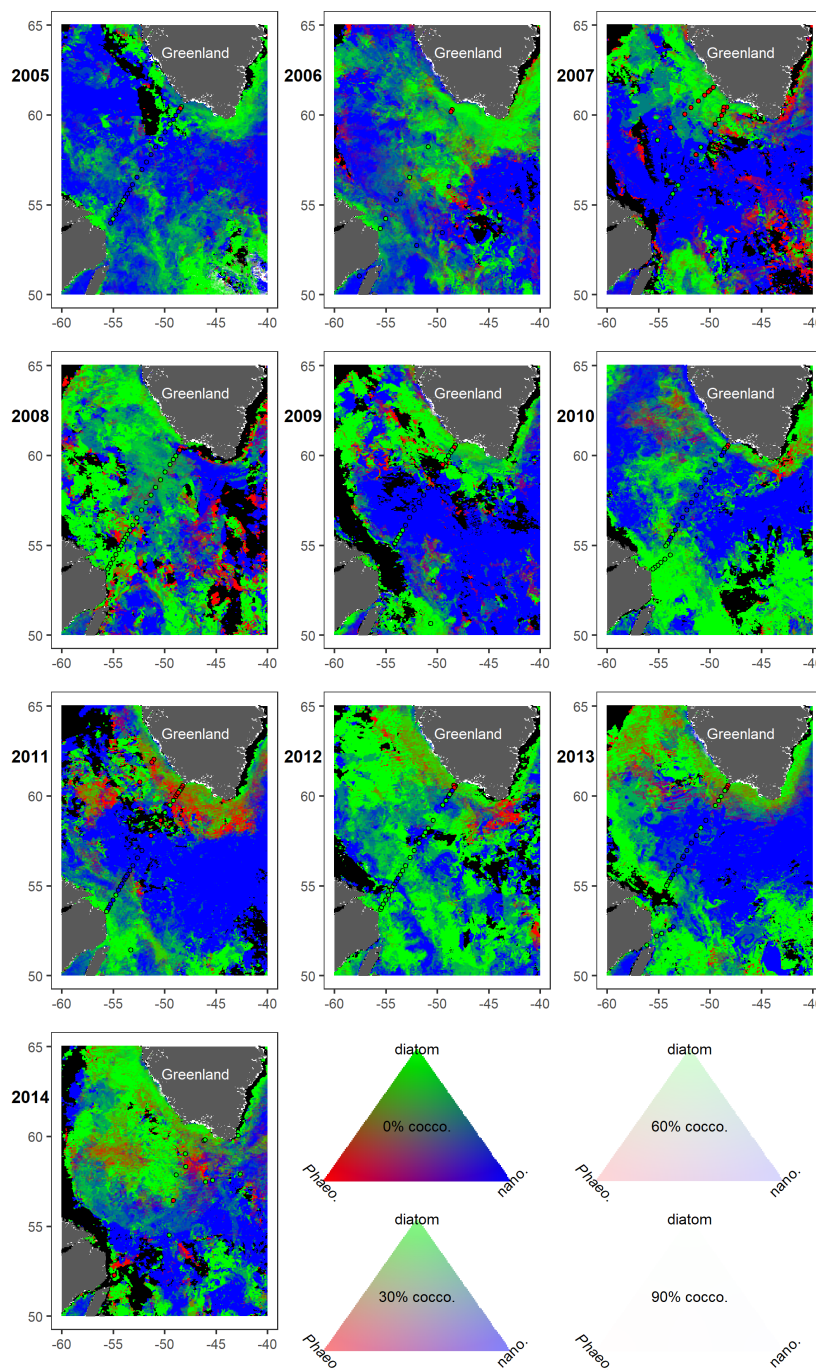

**Figure 9.** Phytoplankton blooms retrieved by remote-sensing in the Labrador Sea (background colour). Colour indicates frequency of phytoplankton classifications; red pixels indicate *Phaeocystis* dominance, green pixels indicate diatom dominance and blue pixels indicate nanophytoplankton dominance. White pixels are dominated by coccolithophores. This colourfield can be envisaged as a triangular prism with red, green and blue vertices, increasing in luminosity along its length. Slices of the colour field are presented as a visual key. Black pixels represent regions with no observations in a given year. The background is over-lain with in-situ samples taken by *Fragoso et al., 2017 [18]* (circular dots: dataset accessible at <https://doi.pangaea.de/10.1594/PANGAEA.871872>). Red-filled circles represent *Phaeocystis*-rich samples, green-filled circles represent diatom-dominated samples and blue-filled circles represent mixed populations dominated by nanophytoplankton.



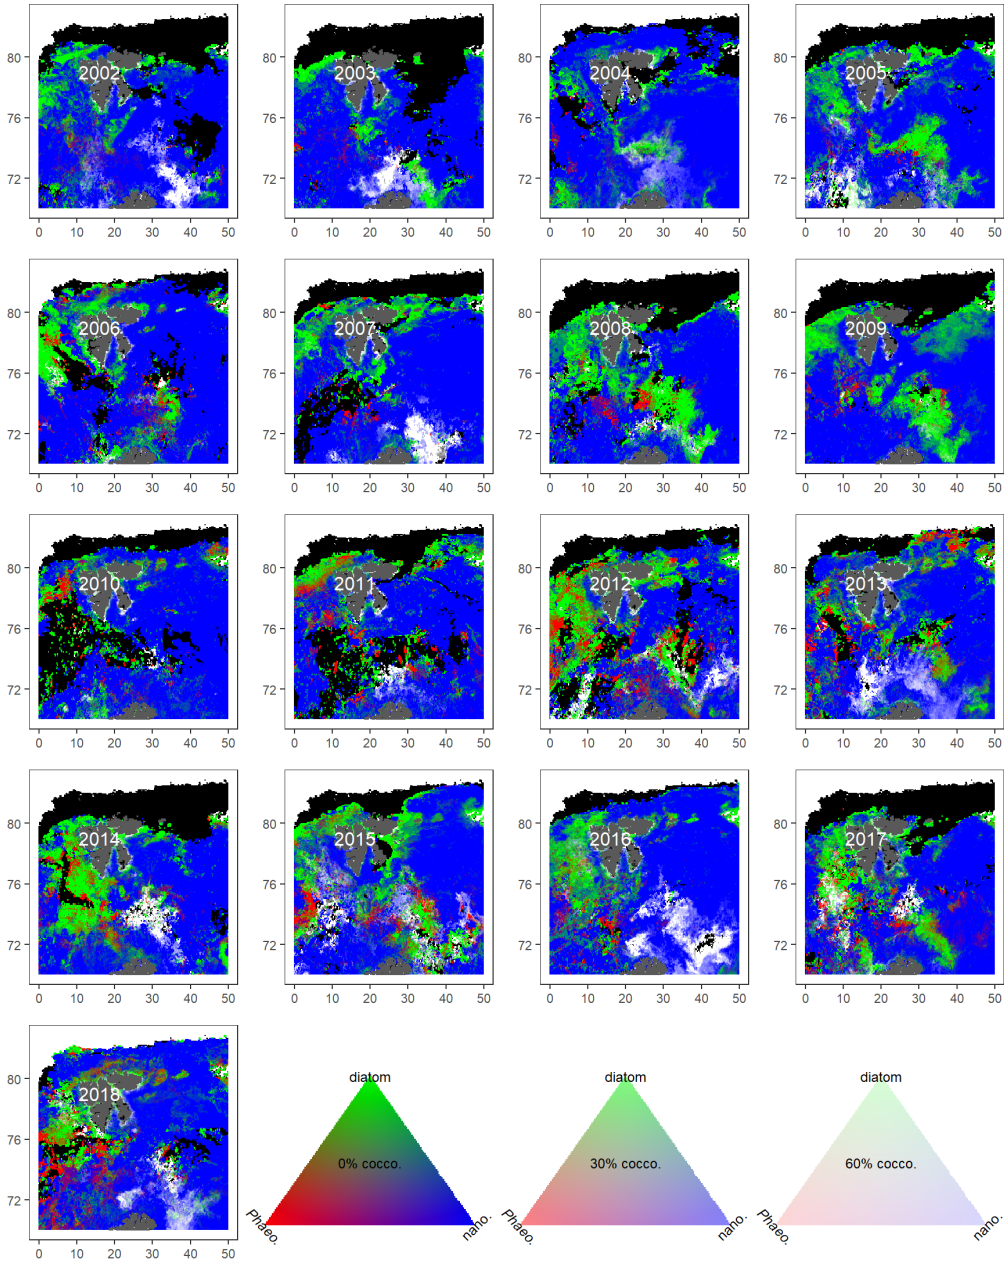

**Figure 10.** Phytoplankton blooms retrieved by remote-sensing in the Barents sea. Colour indicates frequency of phytoplankton classifications; red pixels indicate *Phaeocystis* dominance, green pixels indicate diatom dominance and blue pixels indicate nanophytoplankton dominance. White pixels are dominated by coccolithophores. This colourfield can be envisaged as a triangular prism with red, green and blue vertices, increasing in luminosity along its length. Slices of the colour field are presented as a visual key. Black pixels represent regions with no observations in a given year.

243 **Data Accessibility.** The datasets of optical properties used in the construction of the phytoplankton  
 244 community composition algorithm used in this study are available at [doi:10.5285/97daa7ea-8792-6cff-e053-  
 245 6c86abc0dd46] [doi:10.5285/982b6da2-7e11-060a-e053-6c86abc09389] [doi:10.5285/982b6da2-7e12-060a-e053-  
 246 6c86abc09389], accompanying datasets for chlorophyll-a concentration are available at [doi:10.5285/97daa7ea-  
 247 8793-6cff-e053-6c86abc0dd46] [doi:10.5285/982b6da2-7e13-060a-e053-6c86abc09389] [doi:10.5285/982b6da2-  
 248 7e14-060a-e053-6c86abc09389] MODIS-A data is available from NASA's website for ocean-colour.  
 249 [doi:10.5067/AQUA/MODIS/L3SMI/]

250 **Authors' Contributions.** A. Orkney carried out analyses and drafted the manuscript. H.A. Bouman  
 251 supervised analysis and the drafting of the manuscript. T. Platt edited the manuscript. B. Narayanaswamy,  
 252 assisted in the interpretation of the significance of our results for the structure of benthic communities. I.  
 253 Kostakis set up Hydrolight simulations. All authors read and approved the manuscript.

254 **Competing Interests.** The authors declare that they have no competing interests.

255 **Funding.** This research was funded by the Natural Environment Research Council (NERC) Grant number:  
 256 NE/P006507/1

257 **Acknowledgements.** We acknowledge D. McKee of the University of Strathclyde 16 Richmond St, Glasgow  
 258 G1 1XQ, for assisting in the configuration of Hydrolight. We acknowledge S. Sathyendranath of the Plymouth  
 259 Marine Laboratory, Prospect Place, Plymouth, PL1 3DH, for assessing the validity of our correction scheme  
 260 for temporal drift.

## 261 References

- 262 1. Hancke K, Hovland EK, Volent Z, Pettersen R, Johnsen G, Moline M, et al.  
 263 Optical properties of CDOM across the Polar Front in the Barents Sea: Origin, distribution and  
 264 significance.  
 265 *Journal of Marine Systems*. 2014;130:219–227.
- 266 2. Bricaud A, Morel A, Prieur L.  
 267 Absorption by dissolved organic matter of the sea (yellow substance) in the UV and visible  
 268 domains1.  
 269 *Limnology and Oceanography*. 1981;26(1):43–53.
- 270 3. Babin M, Stramski D, Ferrari GM, Claustre H, Bricaud A, Obolensky G, et al.  
 271 Variations in the light absorption coefficients of phytoplankton, nonalgal particles, and  
 272 dissolved organic matter in coastal waters around Europe.  
 273 *Journal of Geophysical Research: Oceans*. 2003;108(C7).
- 274 4. Meslard F, Bourrin F, Many G, Kerhervé P.  
 275 Suspended particle dynamics and fluxes in an Arctic fjord (Kongsfjorden, Svalbard).  
 276 *Estuarine, Coastal and Shelf Science*. 2018;204:212–224.
- 277 5. Drozdova A, Patsaeva S, Khundzhua D.  
 278 Fluorescence of dissolved organic matter as a marker for distribution of desalinated waters in  
 279 the Kara Sea and bays of Novaya Zemlya archipelago.  
 280 *Oceanology*. 2017;57(1):41–47.
- 281 6. Hovland EK, Dierssen HM, Ferreira AS, Johnsen G.  
 282 Dynamics regulating major trends in Barents Sea temperatures and subsequent effect on  
 283 remotely sensed particulate inorganic carbon.  
 284 *Marine Ecology Progress Series*. 2013;484:17–32.
- 285 7. Carlowicz M, Norman K, Signorini S.  
 286 Dueling Blooms NASA Earth Observatory. 2014.  
 287 Accessed: 2019-04-17.  
 288 Available from: [https://earthobservatory.nasa.gov/images/84135/  
 289 dueling-blooms](https://earthobservatory.nasa.gov/images/84135/dueling-blooms).
- 290 8. GSFC MRRTN.  
 291 Spectacular Bloom in the Barents Sea. 2003.  
 292 Accessed: 2020-03-03.  
 293 Available from: [https://earthobservatory.nasa.gov/images/3649/  
 294 spectacular-bloom-in-the-barents-sea](https://earthobservatory.nasa.gov/images/3649/spectacular-bloom-in-the-barents-sea).



- 295 9. Hansen K, Schmaltz J, Stevens J.  
296 The Barents Sea Abloom. 2016.  
297 Accessed: 2020-03-03.  
298 Available from: [https://earthobservatory.nasa.gov/images/88316/  
299 the-barents-sea-abloom](https://earthobservatory.nasa.gov/images/88316/the-barents-sea-abloom).  
300 10. Carlowicz M, Stevens J, Dauphin L.  
301 Summer Blooms in the Baltic and Barents. 2018.  
302 Accessed: 2020-03-03.  
303 Available from: [https://earthobservatory.nasa.gov/images/92462/  
304 summer-blooms-in-the-baltic-and-barents](https://earthobservatory.nasa.gov/images/92462/summer-blooms-in-the-baltic-and-barents).  
305 11. Stuart V, Sathyendranath S, Head E, Platt T, Irwin B, Maass H.  
306 Bio-optical characteristics of diatom and prymnesiophyte populations in the Labrador Sea.  
307 Marine Ecology Progress Series. 2000;201:91–106.  
308 12. Cota GF, Harrison WG, Platt T, Sathyendranath S, Stuart V.  
309 Bio-optical properties of the Labrador Sea.  
310 Journal of Geophysical Research: Oceans. 2003;108(C7).  
311 13. Sathyendranath S, Watts L, Devred E, Platt T, Caverhill C, Maass H.  
312 Discrimination of diatoms from other phytoplankton using ocean-colour data.  
313 Marine Ecology Progress Series. 2004;272:59–68.  
314 14. Chase A, Boss E, Zaneveld R, Bricaud A, Claustre H, Ras J, et al.  
315 Decomposition of in situ particulate absorption spectra.  
316 Methods in Oceanography. 2013;7:110–124.  
317 15. Hoepffner N, Sathyendranath S.  
318 Determination of the major groups of phytoplankton pigments from the absorption spectra of  
319 total particulate matter.  
320 Journal of Geophysical Research: Oceans. 1993;98(C12):22789–22803.  
321 16. Lohrenz SE, Weidemann AD, Tuel M.  
322 Phytoplankton spectral absorption as influenced by community size structure and pigment  
323 composition.  
324 Journal of Plankton Research. 2003;25(1):35–61.  
325 17. Liu Y, Boss E, Chase A, Xi H, Zhang X, Röttgers R, et al.  
326 Retrieval of phytoplankton pigments from underway spectrophotometry in the Fram Strait.  
327 Remote Sensing. 2019;11(3):318.  
328 18. Fragoso GM, Poulton AJ, Yashayaev IM, Head EJ, Purdie DA.  
329 Spring phytoplankton communities of the Labrador Sea (2005–2014): pigment signatures,  
330 photophysiology and elemental ratios.  
331 Biogeosciences. 2017;14:1235–1259.  
332 19. OBPG.  
333 Moderate-resolution Imaging Spectroradiometer (MODIS) Aqua Daily L3SMI Ocean Colour  
334 Data.  
335 NASA Goddard Space Flight Center, Ocean Ecology Laboratory, Ocean Biology Processing  
336 Group Moderate-resolution Imaging Spectroradiometer (MODIS) Aqua Daily L3SMI Ocean  
337 Colour Data; NASA OBDAAC, Greenbelt, MD, USA. 2019.  
338 20. Alvain S, Moulin C, Dandonneau Y, Loisel H.  
339 Seasonal distribution and succession of dominant phytoplankton groups in the Global Ocean:  
340 A satellite view.  
341 Global Biogeochemical Cycles. 2008;22(3).  
342 21. Jackson T, Bouman HA, Sathyendranath S, Devred E.  
343 Regional-scale changes in diatom distribution in the Humboldt upwelling system as revealed  
344 by remote sensing: implications for fisheries.  
345 ICES Journal of Marine Science. 2010;68(4):729–736.  
346 22. Mobley C, Sundman L.  
347 HydroLight 5.1 EcoLight 5.1 Users' Guide, Sequoia Scientific.  
348 Inc, Bellevue. 2012.  
349 23. Valente A, Sathyendranath S, Brotas V, Groom S, Grant M, Taberner M, et al.  
350 A compilation of global bio-optical in situ data for ocean-colour satellite applications–version  
351 two.  
352 Earth System Science Data. 2019;11(3):1037–1068.

- 353 24. Bricaud A, Babin M, Morel A, Claustre H.  
354 Variability in the chlorophyll-specific absorption coefficients of natural phytoplankton:  
355 Analysis and parameterization.  
356 Journal of Geophysical Research: Oceans. 1995;100(C7):13321–13332.
- 357 25. Astoreca R, Rousseau V, Ruddick K, Knechciak C, Van Mol B, Parent JY, et al.  
358 Development and application of an algorithm for detecting *Phaeocystis globosa* blooms in the  
359 Case 2 Southern North Sea waters.  
360 Journal of Plankton Research. 2008;31(3):287–300.
- 361 26. Hu C, Cannizzaro J, Carder KL, Muller-Karger FE, Hardy R.  
362 Remote detection of *Trichodesmium* blooms in optically complex coastal waters: Examples with  
363 MODIS full-spectral data.  
364 Remote Sensing of Environment. 2010;114(9):2048–2058.
- 365 27. Taylor IA, Preston J, Carboni E, Mather TA, Grainger RG, Theys N, et al.  
366 Exploring the Utility of IASI for Monitoring Volcanic SO<sub>2</sub> Emissions.  
367 Journal of Geophysical Research: Atmospheres. 2018;123(10):5588–5606.
